# Supplementary material for: A kinetic analysis of CO release from a diiron hexacarbonyl complex promoted by amino acids
Source: Royal Society of Chemistry journal article supplement (doi:10.1039/c4nj00661e), 2014-01-01
Supplement: c4nj00661e1.pdf [file c4nj00661e1.pdf]

Electronic Supplementary Material (ESI) for New Journal of Chemistry  
This journal is © The Royal Society of Chemistry 2014

## Kinetic Analysis of CO-releasing of a Diiron Hexacarbonyl Complex Promoted by Amino Acids

Limei Chen <sup>1, 2</sup>, Xiujuan Jiang <sup>2</sup>, Xiu Wang <sup>2</sup>, Li Long <sup>2</sup>, Jiayao, Zhang <sup>2</sup>, Xiaoming  
Liu <sup>1, 2\*</sup>

<sup>1</sup>School of Metallurgy and Chemical Engineering, Jiangxi University of Science and  
Technology

<sup>2</sup>College of Biological, Chemical Sciences and Engineering, Jiaying University

Supporting information

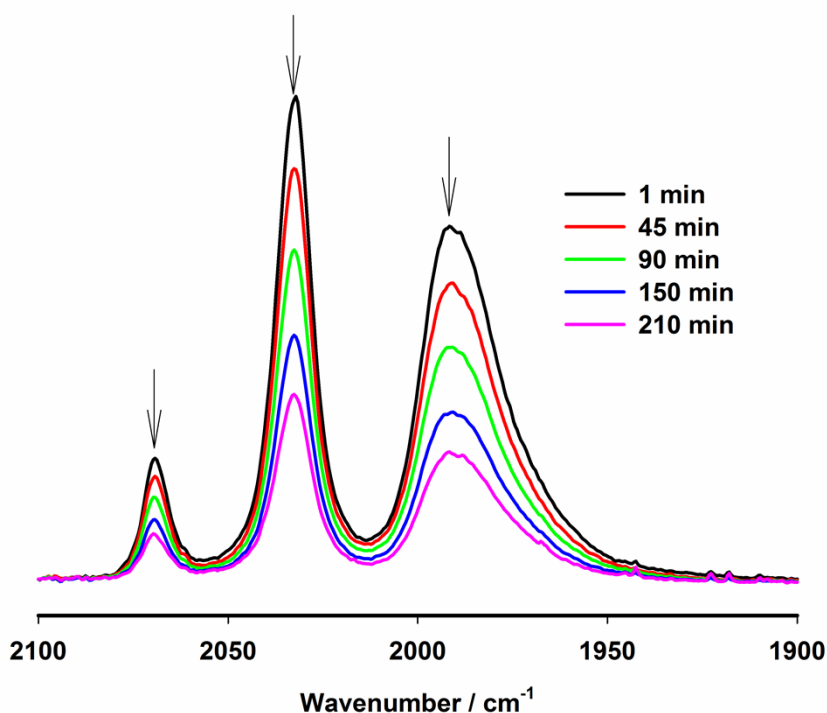

Fig. S1 Infrared spectral variation during the CO-releasing process ( $[1] = 0.0115 \text{ mol L}^{-1}$  and  $[L\text{-proline}] = 0.0345 \text{ mol L}^{-1}$ ) in DMSO / H<sub>2</sub>O mixture at 37 °C under open atmosphere.

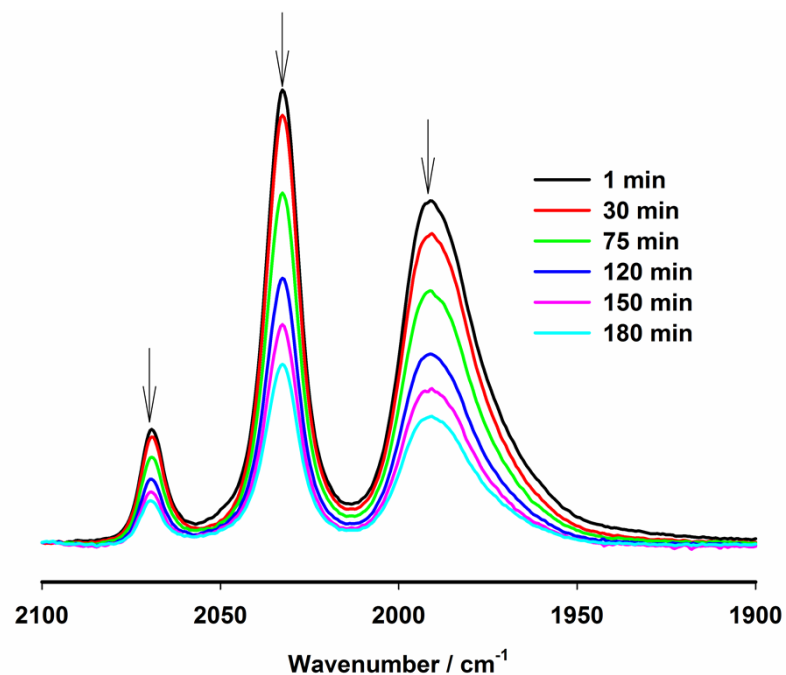

Fig. S2 Infrared spectral variation during the CO-releasing process ( $[1] = 0.0115 \text{ mol L}^{-1}$  and  $[\text{L-histidine}] = 0.0345 \text{ mol L}^{-1}$ ) in DMSO / H<sub>2</sub>O mixture at 37 °C under open atmosphere.

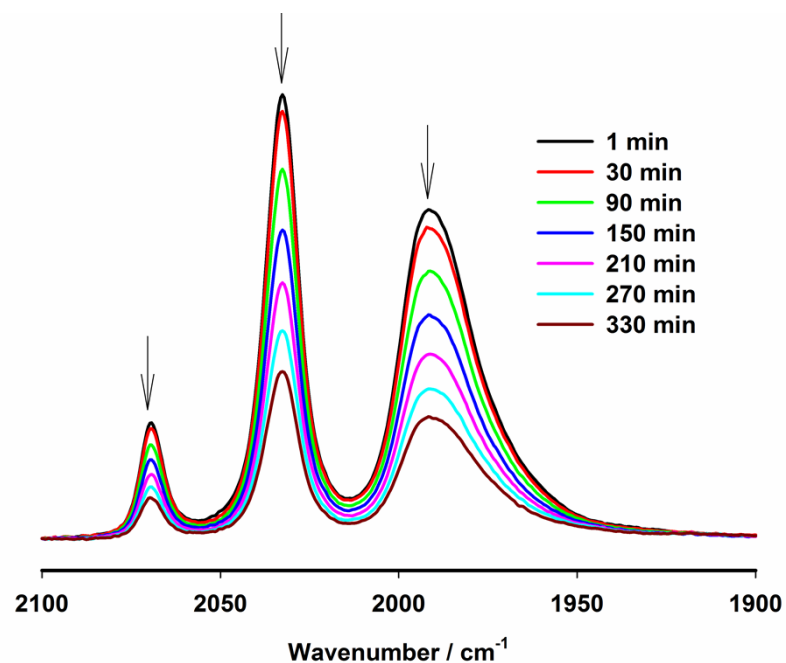

Fig. S3 Infrared spectral variation during the CO-releasing process ( $[1] = 0.0115 \text{ mol L}^{-1}$  and  $[\text{alanine}] = 0.0345 \text{ mol L}^{-1}$ ) in DMSO / H<sub>2</sub>O mixture at 37 °C under open atmosphere.

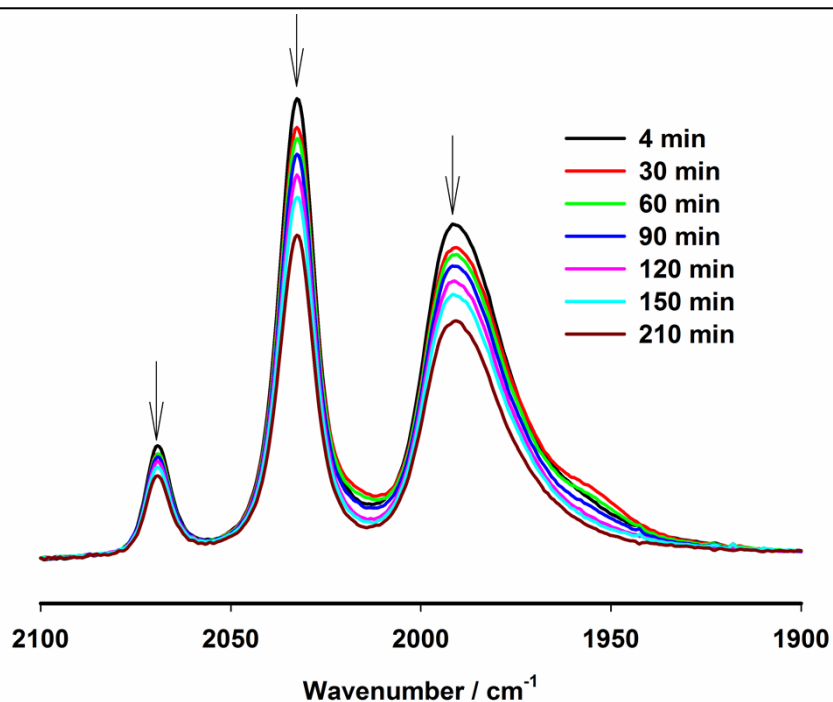

Fig. S4 Infrared spectral variation during the CO-releasing process ( $[1] = 0.0115 \text{ mol L}^{-1}$  and  $[\text{L-cysteine ethyl ester hydrochloride}] = 0.0345 \text{ mol L}^{-1}$ ) in DMSO /  $\text{H}_2\text{O}$  mixture at  $37^\circ\text{C}$  under open atmosphere.

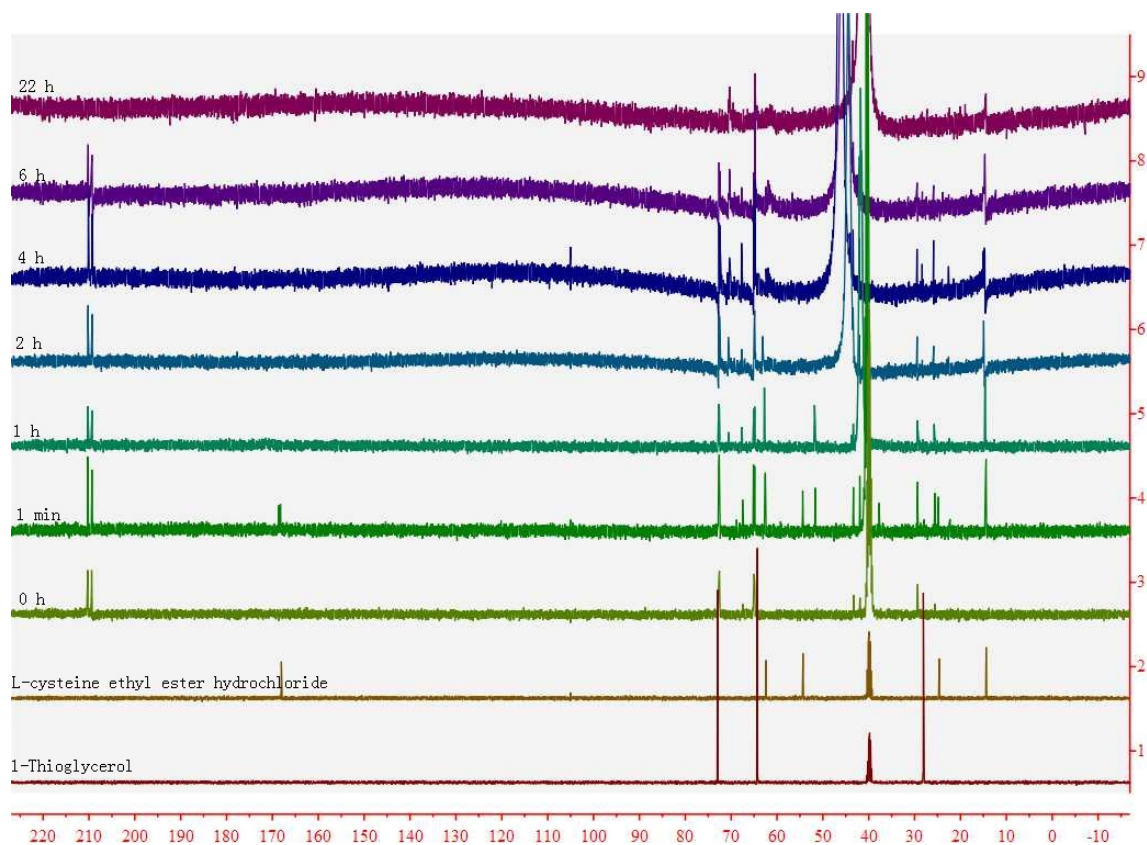

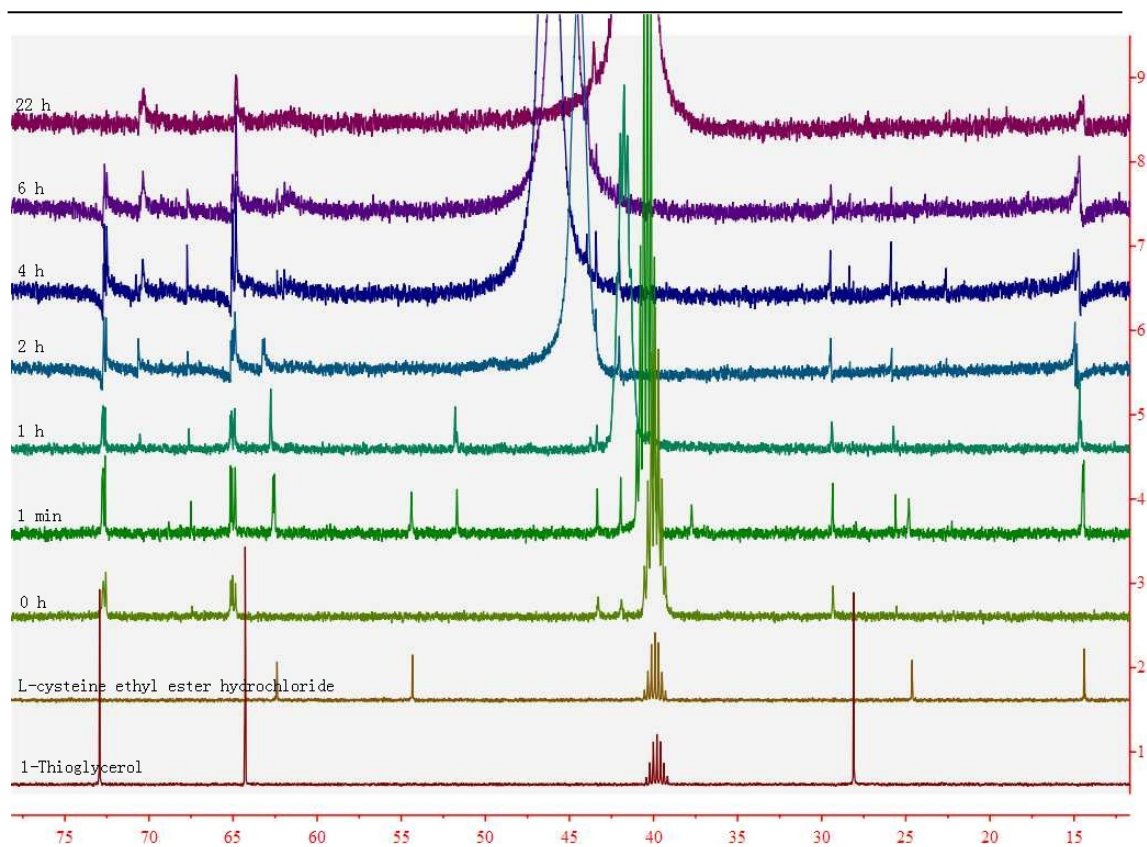

Fig. S5  $^{13}\text{C}$  NMR spectroscopic variation with reaction time of complex **1** under the substitution of L-cysteine ethyl ester hydrochloride (for comparison, the chemical shifts of free 1-thioglycerol, L-cysteine ethyl ester hydrochloride and complex **1** are also included).

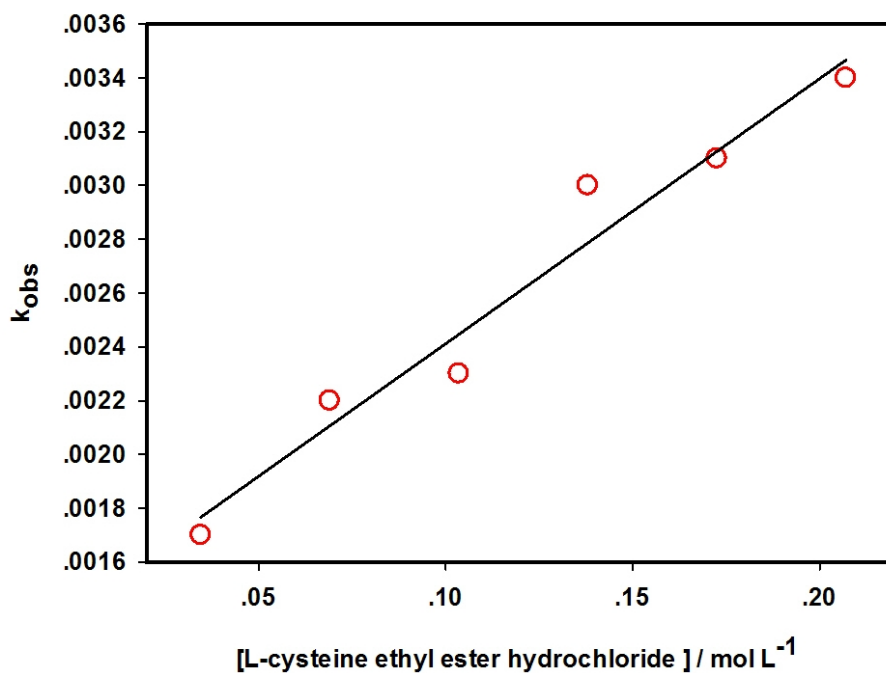

Fig. S6 Plot of  $k_{obs}$  versus the concentration of L-cysteine ethyl ester hydrochloride in which the concentration of complex **1** was kept at 0.0115 mol L<sup>-1</sup>.

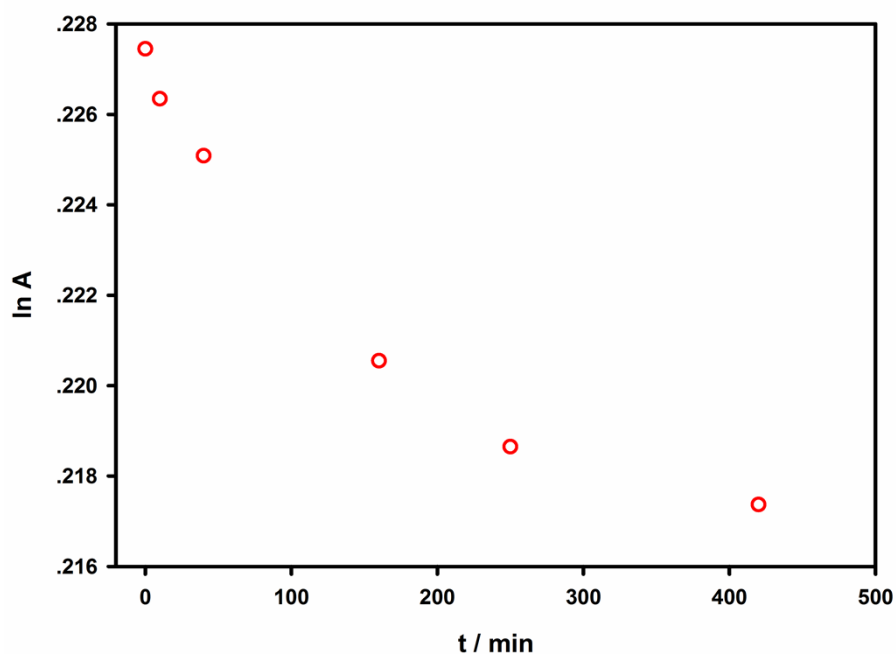

Fig. S7 The logarithmic plots of concentrations of complex **1** against reaction time in the presence of pyridine in DMSO / H<sub>2</sub>O mixture (4:1) at 37 °C under open

atmosphere ( $[1] = 0.0115 \text{ mol L}^{-1}$ , the absorbance used for the kinetic analysis was used at  $2032 \text{ cm}^{-1}$ ).

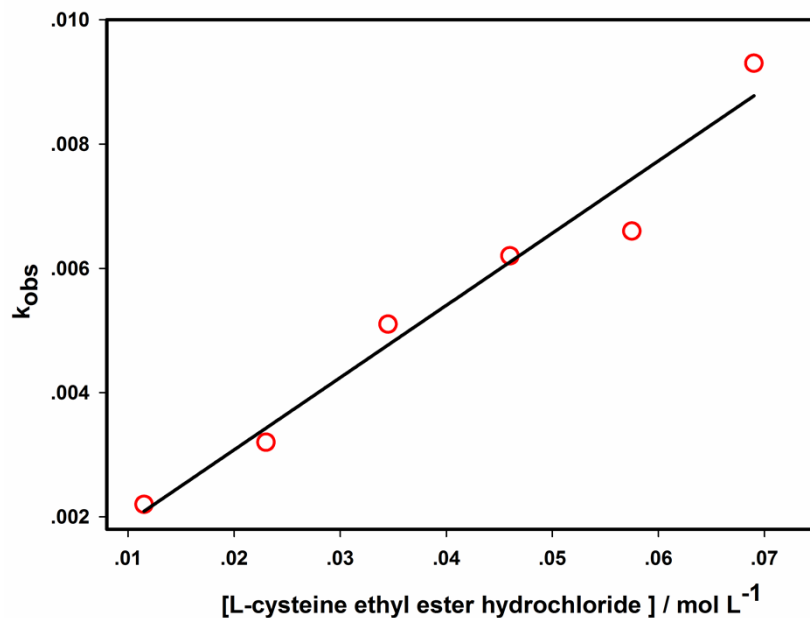

Fig. S8 Plot of  $k_{\text{obs}}$  versus the concentration of L-cysteine ethyl ester hydrochloride in the second stage ( $[1] = 0.0115 \text{ mol L}^{-1}$  in  $\text{D}_2\text{O}$ ).

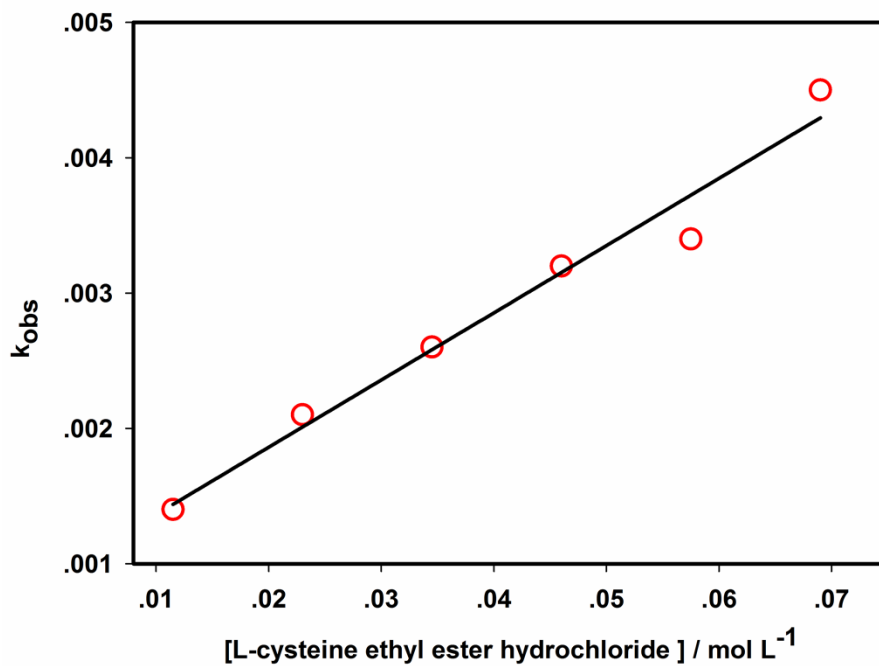

Fig. S9 Plot of  $k_{\text{obs}}$  versus the concentration of L-cysteine ethyl ester hydrochloride in the second stage ( $[1] = 0.0115 \text{ mol L}^{-1}$  in physiological saline).

Table S1 The kinetic data of the decomposition of complex **1** in D<sub>2</sub>O and physiological saline at 37°C in the second stage, respectively ([**1**] = 0.0115 mol L<sup>-1</sup>, [L-cysteine ethyl ester hydrochloride] / [**1**] = 3, 6, 9, 12, 15 and 18, respectively).

---

|                                                        |     |     |     |     |     |     |
|--------------------------------------------------------|-----|-----|-----|-----|-----|-----|
| $k_{\text{obs}} \times 10^{-3}$ (D <sub>2</sub> O)     | 2.2 | 3.2 | 5.1 | 6.2 | 6.6 | 9.3 |
| $t_{1/2}$ (min) (D <sub>2</sub> O)                     | 315 | 217 | 136 | 112 | 105 | 75  |
| $k_{\text{obs}} \times 10^{-3}$ (physiological saline) | 1.4 | 2.1 | 2.6 | 3.2 | 3.4 | 4.5 |
| $t_{1/2}$ (min) (physiological saline)                 | 495 | 330 | 267 | 217 | 204 | 154 |

---
